# Supplementary material for: Seasonal influences on surface ozone variability in continental South Africa and implications for air quality
Source: Copernicus journal article supplement (doi:10.5194/acp-2017-1115), 2018-01-19
Supplement: Supplementary file [file acp-2017-1115-AC1-supplement.pdf]

**Interactive comment on “Seasonal influences on surface ozone variability in continental South Africa and implications for air quality” by Tracey Leah Laban et al. (Ref. No.: acp-2017-1115)**

**Anonymous Referee #1**

Received and published: 4 February 2018

The paper describes observations of ozone and other relevant gas phase species made over a number of years in central South Africa and attempts to evaluate the ozone production regime. The paper describes the sites used and the methodology for assessment.

There are few reported observations of air pollution in Africa and this paper provides a useful description of the regional background conditions present in South Africa. In general, the publication is suitable for publication. However, I have a couple of suggestions which might improve the usefulness of the publication. I outline my major comments and then identify some minor issues.

We would like to thank Referee #1 for the positive review of this paper through recognition of the usefulness of this manuscript and deeming this work suitable for publication in ACP. We would also like to thank Referee #1 for the major and minor suggestions made, which were each carefully considered and addressed/implemented in the paper. Below is a point-by-point response to each of these comments/questions. In addition, a marked-up version of the revised manuscript is also provided indicating all changes made throughout the manuscript. The paper was also proofread by a professional language editor.

Source of the ozone. The authors are trying to make the case that CO plays a significant or dominant role in the production of O<sub>3</sub> over south Africa - 'Abstract: It was indicated that the appropriate emission control strategy should be CO (and VOC) reduction associated with household combustion and regional open biomass burning to effectively reduce O<sub>3</sub> pollution in continental South Africa.' They do this through Figure 6 which shows that trajectories arriving with high CO are the same trajectories with high O<sub>3</sub>. They back this up with the arguments from their calculation of ozone production which is essentially ranks the local O<sub>3</sub> production for the different VOCs / CO by their OH reactivity. The difficulty with the trajectories argument is that it provides evidence of a common source (biomass burning) but doesn't necessarily show that the CO is leading to the ozone. Biomass burning is known to emit significant quantities of VOCs and NO<sub>x</sub> into an air mass, which overall leads to O<sub>3</sub> production. Attributing the ozone production to the CO specifically from the biomass burning is difficult and probably requires a more detailed analysis than that provided here. Similarly, the local reactivity calculation shows that CO is a significant player in the reactivity, but there are not many datapoints in

Figure A2 where the CO is the dominant source of the reactivity. For much of the time it appears that the aromatics, presumably from local industrial activities would outweigh the CO.

Given this, I think that the strength of the comments about the role of CO should probably be toned down. CO is obviously playing a large role here and this is surprising as CO is generally not seen as really leading to regional O<sub>3</sub> production. However, I think a policy of reducing both the CO and the VOCs together is likely the story here rather than an emphasis on CO alone. This would probably change the emphasis of sources from those for CO alone (domestic burning, biomass burning) to include some industrial component which would presumably be the source of the aromatic compounds.

We agree with Referee #1 that the strength of the role of CO on O<sub>3</sub> formation should be toned down and that policy should focus on reducing both CO and VOCs. However, the significance of CO to O<sub>3</sub> formation for this region where biogenic VOCs are relatively less abundant (Jaars et al., 2016) is indicated in this paper, especially through the correlation plots in Fig. 9 and 10 (now Fig. 8 and 9 in the revised manuscript). Therefore the strength of the role of CO on O<sub>3</sub> was toned down in the manuscript in different sections and the contribution of VOCs indicated, without compromising the significance of CO on O<sub>3</sub> formation shown for this region in this paper. Section where changes were made are:

Abstract:

“...emissions of NO<sub>x</sub> in the interior of South Africa. The study indicated that the most effective emission control strategy to reduce O<sub>3</sub> levels in continental South Africa should be CO and VOC reduction mainly associated with household combustion and regional open biomass burning.”

Section 3.3.1 (now Section 3.4.1):

“...characterise the dispersion of biomass burning emissions over southern Africa (Mafusire et al., 2016). Therefore the regional transport of CO and VOCs (and NO<sub>x</sub> to a lesser extent) associated with biomass burning occurring from June to September in southern Africa can be considered an important source of surface O<sub>3</sub> in continental South Africa (Fig. A4).”

Section 3.4.1 (now Section 3.5.1):

“In Fig. 8 the correlations between O<sub>3</sub>, NO<sub>x</sub> and CO concentrations at Welgegund, Botsalano and Marikana are presented, which clearly indicates higher O<sub>3</sub> concentrations associated with increased CO levels, while O<sub>3</sub> levels remain relatively constant (or decrease) with increasing NO<sub>x</sub>. The highest O<sub>3</sub> concentrations occur for NO<sub>x</sub> levels below 10 ppb, since the equilibrium between photochemical production of O<sub>3</sub> and chemical removal of O<sub>3</sub> shifts towards the former i.e. greater O<sub>3</sub> formation. In general there seems to exist a marginal negative correlation between O<sub>3</sub> and NO<sub>x</sub> (Fig. A6) at all four sites, which is a reflection of the photochemical production of O<sub>3</sub> from NO<sub>2</sub> and the destruction of O<sub>3</sub>

through NO<sub>x</sub> titration. These correlations between NO<sub>x</sub>, CO and O<sub>3</sub> indicate that O<sub>3</sub> production in continental South Africa is limited by CO (and VOCs) concentrations, i.e. VOC-limited.”

Section 3.4.2 (now Section 3.5.2):

“...concentrations, which is most pronounced (highest CO/NO<sub>x</sub> ratios) during winter and spring. This indicates that the winter and spring O<sub>3</sub> maximum is primarily driven by increased peroxy radical production from CO and VOCs. The seasonal maximum in O<sub>3</sub> concentration coincides with the maximum CO concentration at the background sites, whilst the O<sub>3</sub> peak occurs just after June/July when CO peaked at the polluted site Marikana (Fig. A5). This observed seasonality in O<sub>3</sub> production signifies the importance of precursor species emissions from open biomass burning during winter and spring in this region, while household combustion for space heating and cooking is also an important source of O<sub>3</sub> precursors as previously discussed.”

Section 3.5.2 (now Section 3.6.2):

“As indicated above (Section 3.4 and 3.5), O<sub>3</sub> formation in the regions where Welgegund, Botsalano and Marikana are located can be considered VOC-limited, while the highly industrialised region with high NO<sub>x</sub> emissions where Elandsfontein is located could also be considered VOC-limited. Rural remote regions are generally considered to be NO<sub>x</sub>-limited due to the availability of NO<sub>x</sub> and the impact of BVOCs (Sillman, 1999). However, Jaars et al. (2016) indicated that BVOC concentrations at a savannah-grassland were at least an order of magnitude lower compared to other regions in the world. Therefore very low BVOC concentrations together with high anthropogenic emissions of NO<sub>x</sub> in the interior of South Africa result in VOC-limited conditions at background sites in continental South Africa.

It is evident that reducing CO and VOC concentrations associated with anthropogenic emissions e.g. household combustion, vehicular emissions and industries, would be the most efficient control strategy to reduce peak O<sub>3</sub> concentrations in the interior of South Africa. It is also imperative to consider the seasonal variation in the CO and VOC source strength in managing O<sub>3</sub> pollution in continental southern Africa. This study also revealed the significant contribution of biomass burning to O<sub>3</sub> precursors in this region, which should also be considered when implementing O<sub>3</sub> control strategies. However, since open biomass burning in southern Africa is of anthropogenic and natural origin, while O<sub>3</sub> concentrations in continental South Africa are also influenced by trans boundary transport of O<sub>3</sub> precursors from open biomass burning occurring in other countries in southern Africa (as indicated above), it is more difficult to control. Nevertheless, open biomass burning caused by anthropogenic practices (e.g. crop residue, pasture maintenance fires, opening burning of garbage) can be addressed.”

## Conclusions:

“The relationship between O<sub>3</sub>, NO<sub>x</sub> and CO at Welgegund, Botsalano and Marikana indicated a strong correlation between O<sub>3</sub> on CO, while O<sub>3</sub> levels remained relatively constant (or decreased) with increasing NO<sub>x</sub>. Although NO<sub>x</sub> and VOCs are usually considered to be the main precursors in ground-level O<sub>3</sub> formation, CO can also drive photochemical O<sub>3</sub> formation. The seasonal changes in the relationship between O<sub>3</sub> and precursor species also reflected the higher CO emissions associated with increased household combustion in winter, and open biomass burning in late winter and spring. The calculation of the P(O<sub>3</sub>) from a two-year VOC dataset at Welgegund, indicated that at least 40% of O<sub>3</sub> production occurred in the VOC-limited regime. These results indicated that large parts in continental South Africa can be considered VOC-limited, which can be attributed to high anthropogenic emissions of NO<sub>x</sub> in this region. It is, however, recommended that future studies investigate more detailed relationships between NO<sub>x</sub>, CO, VOCs and O<sub>3</sub> through photochemical modelling analysis, while concurrent measurement of atmospheric VOCs and •OH would also contribute to the better understanding of surface O<sub>3</sub> in this region.

In this paper some new aspects on O<sub>3</sub> for the continental South Africa have been indicated, which must be taken in consideration when O<sub>3</sub> mitigation strategies are deployed. Emissions of O<sub>3</sub> precursor species associated with the concentrated location of industries in this area could be regulated, while CO and VOC emissions associated with household combustion and regional open biomass burning should also be targeted. However, emissions of O<sub>3</sub> precursor species related to factors, such as household combustion associated with poor socio-economic circumstances and long-range transport, provides a bigger challenge for regulators.”

Observed concentrations. It would be useful to provide a basic time series of concentration for the key compounds measured at the 4 sites (O<sub>3</sub>, CO, NO, NO<sub>2</sub> etc). The summary plots (Figure 3 and Figure 4) are fine in themselves but it would be useful to see the full dataset as this would show the scope of the observations and boost the confidence in the quality of the dataset and the subsequent analysis.

Basic time series of O<sub>3</sub>, NO<sub>x</sub> and CO were included in the Appendix in Fig. A2, A7 and A8, respectively. The following was also included in Section 3.2 (now Section 3.1) and Section 3.3.1 (now Section 3.4.1) referencing these time series plots:

“In Fig. 2 the monthly and diurnal variation for O<sub>3</sub> concentrations measured at the four sites in this study are presented (time series plotted in Fig. A2). Although there is some variability between the sites, monthly...”

“...open biomass burning emissions (i.e. NO<sub>x</sub> and CO indicated in Fig. A3 and Fig. A4, respectively – time series plotted in Fig. A7 and A8), while O<sub>3</sub> levels at Botsalano were predominantly...”

The abstract says that much of region is above 40 ppbv of ozone, whereas the corresponding text (Page 13 lines 15) says that this is the case only in the spring time. Figure 3 would suggest that the observational sites are rarely above 40 ppbv. Can this all be clarified? The color scale on Figure 2 makes it almost impossible to define the color for 40 ppbv. Could this be improved and the color scale on Figure 2 lengthened so that the relationship between colors and concentrations is easier to understand?

We agree with Referee #1 on both aspects indicated here. Although O<sub>3</sub> concentrations exceeded 40 ppb on a daily basis at most of the sites throughout the year as indicated in Fig. 4 (now Fig. 2 in the revised manuscript), this is not clearly indicated in Fig. 3 (now Fig. 4 in the revised manuscript), since mean O<sub>3</sub> concentrations are presented in this figure. The spatial map, i.e. Fig. 2 (now Fig. 3) compiled from average spring O<sub>3</sub> concentrations do, however, indicate relatively high O<sub>3</sub> levels across the region, albeit not necessarily above 40 ppb. Therefore the text referring to the regional O<sub>3</sub> problem in the Abstract, Section 3.1.1 (now Section 3.2.1) and the Conclusions was changed as follows:

#### Abstract

“...four sites in continental South Africa was conducted. The regional O<sub>3</sub> problem was evident with O<sub>3</sub> concentrations regularly exceeding the South African air quality standard limit, while O<sub>3</sub> levels were higher compared to other background sites in the Southern Hemisphere. The temporal O<sub>3</sub> patterns observed at the four sites...”

#### Section 3.1.1 (now Section 3.2.1)

“...Johannesburg-Pretoria megacity, while the rural Vaalwater site in the north also has significantly higher O<sub>3</sub> levels. From Fig. 3 it is evident that O<sub>3</sub> can be considered a regional problem with O<sub>3</sub> concentrations being relatively high across continental South Africa during spring. Fig. 3 also clearly indicates that the four research sites...”

#### Conclusions

“A spatial distribution map of O<sub>3</sub> levels in the interior of South Africa indicated the regional O<sub>3</sub> problem in continental South Africa, which was signified by the regular exceedance of the South African air quality standard limit. The seasonal and diurnal O<sub>3</sub> patterns observed at the four sites in this study resembled typical trends for O<sub>3</sub> in continental...”

The colour scale in Fig. 2 (now Fig. 3) was also improved by lengthening the scale and adding more values on the scale.

Reactivity calculation The reactivity calculation is based on the measured CO and the measured VOCs. It is therefore a lower limit. This should be more explicitly explained. There are some obvious missing compounds in this calculation methane, alkanes, alkenes etc. Their concentrations could be estimated. Would they change the perspective offered on whether the site is VOC or NO<sub>x</sub> limited? Presumably not and it would only have a slight tendency to move the data-points in figure 11 upwards but not very much? It would be better to make some comments about this head on rather than ignoring it.

We agree with Referee #1 that our VOC reactivity estimates are a lower limit. We can only speciate a fraction of the VOCs present in our grab samples. Although we are likely measuring the major contributors to VOC reactivity at Welgegend such as *o*-xylene, CO, styrene, *p,m*-xylene, toluene, ethylbenzene limonene, isoprene,  $\alpha$ -pinene,  $\beta$ -pinene, hexane (depicted in Fig. A2), we are certainly missing methane that could also contribute to increasing the VOC reactivity. Yet, assuming a global ambient concentrations of 1.85 ppm and a rate of oxidation by OH radicals of  $6.68 \times 10^{-15} \text{ cm}^3 \text{ molec}^{-1} \text{ s}^{-1}$  (Srinivasan et al., 2005) would lead to a VOC reactivity of  $0.3 \text{ s}^{-1}$ . Thus, as Referee #1 mentions, a slight tendency to move the data points upwards by  $0.3 \text{ s}^{-1}$ . However, this shift would not impact the O<sub>3</sub> production regime inferred. Nonetheless, our VOC dataset is quite comprehensive and includes 6 trace gases, 19 biogenic VOCs and 20 anthropogenic VOCs, including 13 aromatic and 7 aliphatic compounds as presented in Jaars, et al. 2014, 2016.

To further address Referee #1 comments, we have also amended our tone in the paragraph to discuss all sources of error and estimation in detail in an attempt to be transparent with our calculations and assumptions. Consequently, the paragraph presenting the model in [Section 2.4](#) has been entirely rewritten to address these issues as follows:

“The only speciated VOC dataset available and published in South Africa exists for Welgegend (Jaars et al., 2016; Jaars et al., 2014), which could be used to model instantaneous O<sub>3</sub> production at this site. The concentration of these biogenic and anthropogenic VOCs were obtained from grab samples taken between 11:00 and 13:00 LT over the course of two extensive field campaigns conducted from February 2011 to February 2012 and from December 2013 to February 2015. During this time, 6 trace gases, 19 biogenic VOCs and 20 anthropogenic VOCs, including 13 aromatic and 7 aliphatic compounds were measured. The VOC reactivity were calculated from the respective rate coefficients of each VOC with •OH radicals obtained from chemical kinetic databases such as JPL, NIST and the MCM (e.g. Jaars et al., 2014), to estimate ozone production at 11:00 LT at Welgegend. Specifically, each VOC reactivity was then summed to obtain the total VOC reactivity for each measurement, i.e.  $\text{VOC reactivity} = \sum k_i [\text{VOC}]_i$ . The major contributors to VOC reactivity are depicted in Fig. A1 and include, in approximate order of contribution, *o*-xylene, CO, styrene, *p,m*-xylene, toluene, ethylbenzene limonene, isoprene,  $\alpha$ -pinene,  $\beta$ -pinene and hexane. Of note, key compounds such as methane are not included

that could contribute to VOC reactivity, and thus this VOC reactivity can only be a lower estimate. However, if a global ambient concentration of 1.85 ppm and a rate of oxidation by  $\bullet\text{OH}$  radicals of  $6.68 \times 10^{-15} \text{ cm}^3 \text{ molec}^{-1} \text{ s}^{-1}$  is assumed (Srinivasan et al., 2005), a VOC reactivity of  $0.3 \text{ s}^{-1}$  would be obtained and would therefore account for a small increase in the VOC reactivity calculated in Fig. A1 and Fig. 10.

A mathematical box-model was applied to model  $\text{O}_3$  production as a function of VOC reactivity and  $\text{NO}_2$  concentrations. This model involves three steps, (1) estimation of  $\text{HO}_x$  (sum of  $\bullet\text{OH}$  and  $\text{HO}_2\bullet$  radicals) production, (2) estimation of the  $\bullet\text{OH}$  radical concentration, and (3) the calculation for  $\text{O}_3$  production (Murphy et al., 2006; Geddes et al., 2009). The VOC concentrations are the limiting factor in the ability to model  $\text{O}_3$  production at Welgegund, since only data for the 11:00 to 13:00 LT grab samples was available (Fig. A1). Therefore, the model approach does not coincide with peak  $\text{O}_3$  typically observed around 14:00 to 15:00 LT, and thus likely represents a lower estimate.

The production rate of  $\text{HO}_x$  ( $P(\text{HO}_x)$ ) depends on the photolysis rate of  $\text{O}_3$  ( $J_{\text{O}_3}$ ), concentration of  $\text{O}_3$  and vapour pressure of water (Jaegle et al., 2001). The photolysis rate proposed for the Southern Hemisphere, i.e.  $J_{\text{O}_3} = 3 \times 10^{-5} \text{ s}^{-1}$  (Wilson, 2015) was used from which  $P(\text{HO}_x)$  was calculated as follows:

$$P(\text{HO}_x) = 2J_{\text{O}_3}k_{\text{O}_3}[\text{O}_3][\text{H}_2\text{O}]$$

and estimated to be  $6.09 \times 10^6 \text{ molec cm}^{-3} \text{ s}^{-1}$  or  $0.89 \text{ ppbv h}^{-1}$  (calculated for a campaign  $\text{O}_3$  average of 41 ppbv and a campaign RH average of 42 % at 11:00 LT each day) at STP. The  $P(\text{HO}_x)$  at Welgegund is approximately a factor of two lower compared to other reported urban  $P(\text{HO}_x)$  values (Geddes et al., 2009). The factors and reactions that affect  $[\bullet\text{OH}]$  include:

- linear dependency between  $\bullet\text{OH}$  and  $\text{NO}_x$  due to the reaction  $\text{NO} + \text{HO}_2 \rightarrow \bullet\text{OH} + \text{NO}_2$ , until  $\bullet\text{OH}$  begins to react with elevated  $\text{NO}_2$  concentrations to form  $\text{HNO}_3$  ( $\text{OH} + \text{NO}_2 + \text{M} \rightarrow \text{HNO}_3 + \text{M}$ );
- $P(\text{HO}_x)$  is affected by solar irradiance, temperature,  $\text{O}_3$  concentrations, humidity; and
- partitioning of  $\text{HO}_x$  between  $\text{RO}_2$ ,  $\text{HO}_2$ ,  $\text{OH}$ .

$[\bullet\text{OH}]$  was calculated at 11:00 LT each day as follows:

$$A = k_{5\text{eff}} \left( \frac{\text{VOC reactivity}}{k_{2\text{eff}}[\text{NO}]} \right)^2$$

$$B = k_4[\text{NO}_2] + \alpha * \text{VOC reactivity}$$



$$C = P(HO_x)$$

$$[OH] = \frac{-B + \sqrt{B^2 + 24C * A}}{12 * A}$$

The instantaneous production rate of O<sub>3</sub>, P(O<sub>3</sub>) could then be calculated as a function of NO<sub>2</sub> levels and VOC reactivity. A set of reactions used to derive the equations that describe the dependence of the •OH, peroxy radicals (HO<sub>2</sub>•+RO<sub>2</sub>•) and P(O<sub>3</sub>) on NO<sub>x</sub> is given by Murphy et al. (2006), which present the following equation to calculate P(O<sub>3</sub>):

$$P(O_3) = k_{2eff}[HO_2 + RO_2][NO] = 2 * VOC \text{ Reactivity} * [OH]$$

where k<sub>2eff</sub> is the effective rate constant of NO oxidation by peroxy radicals (chain propagation and - termination reactions in the production of O<sub>3</sub>). The values of the rate constants and other parameters used as input parameters to solve the equation above, can be found in Murphy et al. (2006) and Geddes et al. (2009).”

In addition [Section 3.4.3 \(now Section 3.5.3\)](#) was also rewritten to indicate limitations of the model as follows:

“In Fig. 10 P(O<sub>3</sub>) as a function of VOC reactivity calculated from the available VOC dataset for Welgegund (Section 2.4) and NO<sub>2</sub> concentrations is presented. O<sub>3</sub> production at Welgegund during two field campaigns, specifically at 11:00 LT, were found to range between 0 and 10 ppbv h<sup>-1</sup>. The average P(O<sub>3</sub>) over the 2011 to 2012 and the 2014 to 2015 campaigns combined were 3.0 ± 1.9 ppbv h<sup>-1</sup> and 3.2 ± 3.0 ppbv h<sup>-1</sup>, respectively. The dashed black line in Fig. 10, called the ridge line, separates the NO<sub>x</sub>- and VOC-limited regimes. To the left of the ridge line is the NO<sub>x</sub>-limited regime, when O<sub>3</sub> production increases with increasing NO<sub>x</sub> concentrations. The VOC-limited regime is to the right of the ridge line, when O<sub>3</sub> production decreases with increasing NO<sub>x</sub>. According to the O<sub>3</sub> production plot presented, approximately 40% of the data is found in the VOC-limited regime area, which would support the regional O<sub>3</sub> analysis conducted for continental South Africa in this study. However, the O<sub>3</sub> production plot for Welgegund transitions between NO<sub>x</sub>- and VOC-limited regimes with Welgegund being in a NO<sub>x</sub>-limited production regime the majority of the time, especially when NO<sub>x</sub> concentrations are very low (<1 ppb). As indicated in Section 2.4, limitations to this analysis include limited VOC speciation data, as well as a single time-of-day grab sample. The O<sub>3</sub> production rates can therefore only be inferred at 11:00 am LT despite O<sub>3</sub> concentrations peaking during the afternoon at Welgegund. Therefore, clean background air O<sub>3</sub> production is most-likely NO<sub>x</sub>-limited (Tiitta et al., 2014), while large parts of the regional background of continental South Africa can be considered VOC-limited.”



## **Minor comments.**

The abstract is rather long. Could this be shortened?

We agree with Referee #1 (and Referee #2) that the abstract is too long, which was significantly shortened in the revised manuscript as follows:

“Although elevated surface ozone ( $O_3$ ) concentrations are observed in many areas within southern Africa, few studies have investigated the regional atmospheric chemistry and dominant atmospheric processes driving surface  $O_3$  formation in this region. Therefore an assessment of comprehensive continuous surface  $O_3$  measurements performed at four sites in continental South Africa was conducted. The regional  $O_3$  problem was evident with  $O_3$  concentrations regularly exceeding the South African air quality standard limit, while  $O_3$  levels were higher compared to other background sites in the Southern Hemisphere. The temporal  $O_3$  patterns observed at the four sites resembled typical trends for  $O_3$  in continental South Africa with  $O_3$  concentration peaking in late winter and early spring. Increased  $O_3$  concentrations in winter were indicative of increased emissions of  $O_3$  precursors from household combustion and other low-level sources, while a spring maximum observed at all the sites was attributed to increased regional biomass burning. Source area maps of  $O_3$  and CO indicated significantly higher  $O_3$  and CO concentrations associated with air masses passing over a region with increased seasonal open biomass burning, which indicated CO associated with open biomass burning as a major source of  $O_3$  in continental South Africa. A strong correlation between  $O_3$  on CO was observed, while  $O_3$  levels remained relatively constant or decreased with increasing  $NO_x$ , which supports a VOC-limited regime. The instantaneous production rate of  $O_3$  calculated at Welgegund indicated that ~40% of  $O_3$  production occurred in the VOC-limited regime. The relationship between  $O_3$  and precursor species suggests that continental South Africa can be considered VOC-limited, which can be attributed to high anthropogenic emissions of  $NO_x$  in the interior of South Africa. The study indicated that the most effective emission control strategy to reduce  $O_3$  levels in continental South Africa should be CO and VOC reduction mainly associated with household combustion and regional open biomass burning.”

The explanation of ozone production at the top of page 3 is a little confused. It starts of saying that the only way to produce ozone is through  $NO_2$  photolysis but then says that this doesn't make ozone. Can this be re-phrased to be clearer?

$NO_2$  photolysis is the only known way through which  $O_3$  is produced in the troposphere. However the resultant  $O_3$  reacts with NO to form  $NO_2$ , which will again undergo photolysis to produce  $O_3$  and NO resulting in a null cycle, i.e. the photostationary state (PSS). This equilibrium is disturbed when peroxy radicals alter the PSS producing  $NO_2$ , which lead to the formation of  $O_3$  in excess of the null cycle.

This entire paragraph in the Introduction was changed in accordance with a suggestion made by Referee #2 and to address the confusion indicated by Referee #1 in the above mentioned comment as follows:

“Tropospheric O<sub>3</sub> concentrations are regulated by three processes, i.e. chemical production/destruction, atmospheric transport and losses to surface through dry deposition (Monks et al., 2015). The photolysis of nitrogen dioxide (NO<sub>2</sub>) in the presence of sunlight is the only known way of producing O<sub>3</sub> in the troposphere (Logan, 1985). O<sub>3</sub> can recombine with nitric oxide (NO) to regenerate NO<sub>2</sub>, which will again undergo photolysis to regenerate O<sub>3</sub> and NO. This continuous process is known as the NO<sub>x</sub>-dependent photostationary state (PSS) and results in no net production or consumption of ozone (null cycle). However, net production of O<sub>3</sub> in the troposphere occurs outside the PSS when peroxy radicals (HO<sub>2</sub> and RO<sub>2</sub>) alter the PSS by oxidising NO to produce ‘new’ NO<sub>2</sub> (Cazorla and Brune, 2010) resulting in net O<sub>3</sub> production. The main source of these peroxy radicals in the atmosphere is the reaction of the hydroxyl radical (OH\*) with volatile organic compounds (VOCs) or carbon monoxide (CO) (Cazorla and Brune, 2010).”

Page 4 line 30. It would be useful to explain what the South Africa AQ standard for O<sub>3</sub> is here. It is mentioned in a couple of places in the text but it take us a bit of time to find out what these values are.

We thank Referee #1 for pointing this out. The following has been included in the Introduction:

“...provincial governments, local municipalities and industries (<http://www.saaqis.org.za>). High O<sub>3</sub> concentrations are observed in many areas within the interior of South Africa that exceed the South African standard O<sub>3</sub> limit, i.e. an 8-hour moving average of 61 ppb (e.g. Laakso et al., 2013). These exceedances can be attributed to high anthropogenic...”

The resolution of Figure 7 is rather low. The country names are not clear at the output resolution.

We agree with Referee #1 and have improved the resolution, text size and marker sizes. The modified figures are presented below.

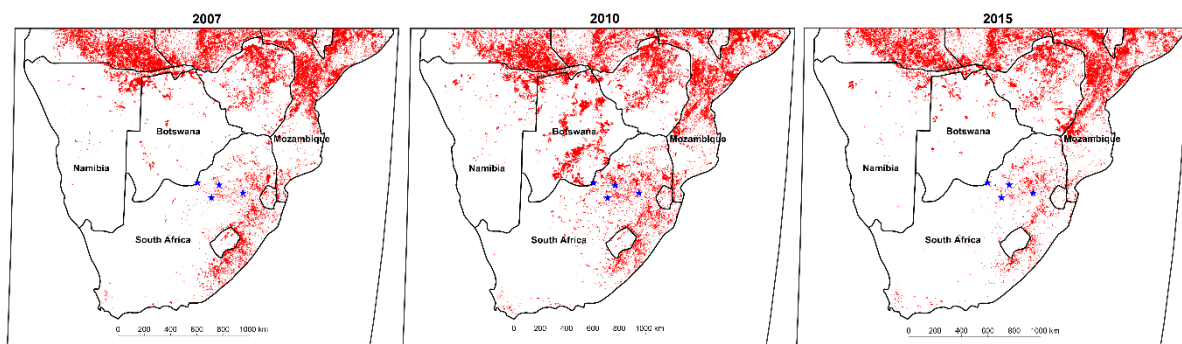

**Fig. 7.** Spatial distribution of fires in 2007, 2010 and 2015 from MODIS burnt area product. Blue stars indicate (from left to right) Botsalano, Welgegund, Marikana and Elandsfontein.

The text at the start of section 3.4 is a little confused. The first sentence says that there is an absence of VOC data. The next sentence talks about a two-year dataset. It's not obvious what the first sentence therefore means.

We completely agree with the confusion/inconsistence in these two sentences indicated by Referee #1. What was meant here is that no continuous measurement data existed for VOCs for any of the sites. However, there was VOC data available for Welgegund from VOC measurements conducted with adsorbent tubes during two sampling campaigns, which could be used to calculate the instantaneous production rate of O<sub>3</sub>. Therefore the text was changed as follows to clarify the confusion:

“The relationship between O<sub>3</sub>, NO<sub>x</sub> and CO was used as an indicator to infer the O<sub>3</sub> production regime at Welgegund, Botsalano and Marikana (no CO measurements were conducted at Elandsfontein as indicated above), since no continuous VOC measurements were conducted at each of these sites. However, as indicated in Section 2.4, a two-year VOC dataset was available for Welgegund (Jaars et al., 2016; Jaars et al., 2014), which was used to calculate the instantaneous production rate of O<sub>3</sub> as a function of NO<sub>2</sub> levels and VOC reactivity (Geddes et al., 2009; Murphy et al., 2006).”

I'm not sure that Figure A1 is necessary. Its comes out of the calculation but its isn't really needed for the calculation of P(O<sub>3</sub>) which essentially just uses the reactivity. Just stating the campaign average value and the variability is enough to show that the calculation is giving a reasonable number.

Figure A1 was removed from the Appendix as suggested by Referee #1. In response to a previous comment by Referee #1, the paragraph presenting the model in [Section 2.4](#) was also entirely rewritten.
